# Supplementary material for: A Combined Metabolomic and Proteomic Analysis of Gestational Diabetes Mellitus
Source: PubMed Central journal article supplement (PMC4691080; doi:10.3390/ijms161226133), 2015-12-16
Supplement: ijms-16-26133-s001.pdf [file ijms-16-26133-s001.pdf]

# Supplementary Materials: A Combined Metabolomic and Proteomic Analysis of Gestational Diabetes Mellitus

Joanna Hajduk, Agnieszka Klupczyńska, Paweł Dereziński, Jan Matysiak, Piotr Kokot, Dorota Nowak, Marzena Gajęcka, Ewa Nowak-Markwitz and Zenon J. Kokot

**Table S1.** The concentrations of determined free amino acids using the LC-ESI-QqQ-MS/MS method in plasma of the study and control group. Bold font indicates *p*-values lower than 0.05.

| Amino Acid                        | Abbreviation | Calculated Concentration in the Samples (μM) |        |       |       |                                |        |       |       | <i>p</i> -Value * |
|-----------------------------------|--------------|----------------------------------------------|--------|-------|-------|--------------------------------|--------|-------|-------|-------------------|
|                                   |              | Study Group ( <i>n</i> = 18)                 |        |       |       | Control Group ( <i>n</i> = 13) |        |       |       |                   |
|                                   |              | Average                                      | Median | Min.  | Max.  | Average                        | Median | Min.  | Max.  |                   |
| Taurine                           | Tau          | 23.8                                         | 24.2   | 17.7  | 31.1  | 26.5                           | 23.9   | 18.6  | 40.5  | 0.181             |
| L-Asparagine                      | Asn          | 38.7                                         | 37.1   | 30.1  | 55.5  | 47.5                           | 48.9   | 32.6  | 57.1  | <b>0.001</b>      |
| L-Serine                          | Ser          | 102.3                                        | 103.6  | 78.6  | 132.6 | 94.9                           | 95.9   | 62.5  | 126.1 | 0.258             |
| Glycine                           | Gly          | 164.4                                        | 164.0  | 122.1 | 251.9 | 172.2                          | 173.9  | 127.5 | 217.5 | 0.476             |
| Hydroxy-L-proline                 | Hyp          | 9.7                                          | 9.8    | 6.2   | 15.0  | 11.3                           | 9.3    | 6.3   | 26.3  | 0.645             |
| Ethanolamine                      | EtN          | 5.1                                          | 5.1    | 4.4   | 6.1   | 4.6                            | 4.6    | 3.2   | 6.8   | 0.054             |
| L-Glutamine                       | Gln          | 278.2                                        | 282.8  | 228.9 | 346.5 | 303.7                          | 318.7  | 234.5 | 401.7 | 0.103             |
| L-Asparticacid                    | Asp          | 6.5                                          | 6.4    | 4.5   | 9.5   | 6.0                            | 5.6    | 3.6   | 10.9  | 0.180             |
| L-Citrulline                      | Cit          | 15.3                                         | 15.1   | 10.0  | 20.5  | 12.5                           | 12.2   | 8.3   | 19.5  | <b>0.015</b>      |
| L-Threonine                       | Thr          | 154.4                                        | 152.8  | 117.4 | 197.6 | 161.5                          | 168.6  | 108.8 | 225.0 | 0.547             |
| Sarcosine                         | Sar          | 1.6                                          | 1.7    | 1.3   | 2.0   | 1.7                            | 1.7    | 1.6   | 2.0   | 0.246             |
| β-Alanine                         | bAla         | 28.5                                         | 26.0   | 19.7  | 46.5  | 28.4                           | 27.9   | 18.5  | 40.5  | 0.889             |
| L-Alanine                         | Ala          | 298.2                                        | 297.5  | 22.1  | 457.4 | 341.3                          | 348.9  | 211.5 | 423.9 | 0.148             |
| L-Glutamicacid                    | Glu          | 48.9                                         | 48.8   | 25.6  | 74.6  | 42.0                           | 35.6   | 26.6  | 65.1  | 0.160             |
| L-Histidine                       | His          | 68.8                                         | 66.4   | 57.7  | 98.0  | 68.5                           | 67.2   | 57.8  | 79.3  | 0.704             |
| 1-Methyl-L-histidine              | 1MHis        | 1.9                                          | 1.1    | 0.2   | 8.4   | 2.0                            | 1.5    | 0.2   | 9.2   | 0.734             |
| 3-Methyl-L-histidine              | 3MHis        | 1.5                                          | 1.5    | 1.0   | 2.1   | 1.7                            | 1.8    | 1.2   | 2.4   | 0.124             |
| L-α-Aminoadipicacid               | Aad          | 0.6                                          | 0.6    | 0.3   | 1.1   | 0.7                            | 0.6    | 0.5   | 1.0   | 0.246             |
| γ-Amino- <i>n</i> -butyric acid   | GABA         | 0.1                                          | 0.1    | 0.1   | 0.3   | 0.2                            | 0.2    | 0.1   | 0.2   | 0.589             |
| D. L-β-Aminoisobutyric acid       | bAib         | 1.5                                          | 1.4    | 0.7   | 3.3   | 1.5                            | 1.4    | 0.8   | 2.4   | 0.825             |
| L-α-Amino- <i>n</i> -butyric acid | Abu          | 13.8                                         | 14.6   | 6.1   | 24.9  | 11.8                           | 10.1   | 5.8   | 30.4  | 0.207             |
| L-Arginine                        | Arg          | 39.5                                         | 39.8   | 18.4  | 53.2  | 34.0                           | 32.7   | 19.6  | 46.8  | 0.103             |

Table S1. Cont.

| Amino Acid              | Abbreviation | Calculated Concentration in the Samples ( $\mu\text{M}$ ) |        |       |       |                                |        |       |       | <i>p</i> -Value * |
|-------------------------|--------------|-----------------------------------------------------------|--------|-------|-------|--------------------------------|--------|-------|-------|-------------------|
|                         |              | Study Group ( <i>n</i> = 18)                              |        |       |       | Control Group ( <i>n</i> = 13) |        |       |       |                   |
|                         |              | Average                                                   | Median | Min.  | Max.  | Average                        | Median | Min.  | Max.  |                   |
| L-Proline               | Pro          | 148.3                                                     | 144.2  | 102.4 | 216.5 | 146.1                          | 152.8  | 97.2  | 175.2 | 0.860             |
| L-Ornithine             | Orn          | 30.6                                                      | 29.6   | 14.4  | 44.3  | 37.0                           | 36.7   | 24.9  | 53.4  | <b>0.038</b>      |
| L-Cystine               | Cys          | 1.2                                                       | 1.2    | 0.4   | 1.2   | 1.2                            | 1.2    | 0.5   | 2.0   | 0.562             |
| $\delta$ -Hydroxylysine | Hyl          | 2.2                                                       | 2.2    | 1.5   | 3.1   | 2.2                            | 2.2    | 1.5   | 3.0   | 1.000             |
| L-Lysine                | Lys          | 120.3                                                     | 110.3  | 77.6  | 190.3 | 132.6                          | 125.2  | 109.4 | 180.9 | 0.052             |
| L-Methionine            | Met          | 18.8                                                      | 18.0   | 15.0  | 25.9  | 20.5                           | 20.1   | 13.2  | 33.6  | 0.262             |
| L-Valine                | Val          | 163.3                                                     | 157.4  | 125.0 | 230.6 | 183.2                          | 182.3  | 118.0 | 246.3 | <b>0.029</b>      |
| L-Tyrosine              | Tyr          | 31.5                                                      | 30.3   | 21.6  | 45.4  | 32.5                           | 33.6   | 23.0  | 43.5  | 0.671             |
| L-Isoleucine            | Ile          | 48.2                                                      | 48.6   | 32.1  | 77.1  | 50.3                           | 49.0   | 38.4  | 66.7  | 0.578             |
| L-Leucine               | Leu          | 73.8                                                      | 72.8   | 51.3  | 113.5 | 77.5                           | 75.7   | 54.1  | 99.2  | 0.512             |
| L-Phenylalanine         | Phe          | 43.2                                                      | 42.3   | 37.0  | 59.1  | 42.0                           | 42.4   | 32.7  | 50.2  | 0.968             |
| L-Tryptophan            | Trp          | 36.6                                                      | 36.0   | 29.0  | 46.4  | 36.7                           | 37.4   | 26.9  | 45.6  | 0.948             |

\* *p* values were calculated according to *t*-test or Mann-Whitney *U* test.

**Table S2.** The intensities of peptide ions acquired using the MALDI-TOF-MS method in plasma of the study and control group. Bold font indicates  $p$ -values lower than 0.05.

| Peptide Ion<br>( $m/z$ ) | Intensities in the Samples |        |      |       |                            |        |       |       | $p$ -Value * |
|--------------------------|----------------------------|--------|------|-------|----------------------------|--------|-------|-------|--------------|
|                          | Study Group ( $n = 18$ )   |        |      |       | Control Group ( $n = 13$ ) |        |       |       |              |
|                          | Average                    | Median | Min. | Max.  | Average                    | Median | Min.  | Max.  |              |
| 1005.07                  | 16.1                       | 15.6   | 4.8  | 27.3  | 17.5                       | 17.4   | 5.4   | 36.9  | 0.565        |
| 1020.82                  | 45.3                       | 41.2   | 16.6 | 84.4  | 49.2                       | 52.1   | 32.0  | 71.9  | 0.559        |
| 1030.73                  | 13.1                       | 13.8   | 4.4  | 27.0  | 16.4                       | 14.2   | 6.3   | 38.8  | 0.222        |
| 1037.09                  | 58.0                       | 48.0   | 30.9 | 108.1 | 57.7                       | 58.0   | 12.7  | 97.3  | 0.795        |
| 1044.23                  | 34.6                       | 35.4   | 2.5  | 55.0  | 42.8                       | 41.7   | 12.0  | 58.9  | 0.070        |
| 1053.01                  | 17.5                       | 14.0   | 1.0  | 51.2  | 23.1                       | 18.8   | 8.0   | 68.0  | 0.289        |
| 1060.99                  | 606.6                      | 637.2  | 79.0 | 778.0 | 660.3                      | 669.9  | 390.2 | 776.4 | 0.082        |
| 1077.09                  | 170.4                      | 175.1  | 11.0 | 349.5 | 228.9                      | 230.6  | 48.2  | 352.2 | 0.115        |
| 1082.84                  | 117.0                      | 121.5  | 32.1 | 216.3 | 112.8                      | 102.5  | 80.1  | 159.0 | 0.752        |
| 1093.29                  | 17.7                       | 17.1   | 10.3 | 24.9  | 18.8                       | 17.8   | 13.8  | 31.2  | 0.479        |
| 1099.17                  | 314.9                      | 313.2  | 27.7 | 496.0 | 299.0                      | 284.2  | 101.8 | 525.9 | 0.702        |
| 1109.49                  | 18.0                       | 17.5   | 1.7  | 40.1  | 20.9                       | 21.9   | 1.0   | 45.9  | 0.535        |
| 1114.48                  | 12.5                       | 11.1   | 0.0  | 40.5  | 16.3                       | 7.8    | 4.3   | 54.9  | 0.617        |
| 1121.27                  | 53.8                       | 53.8   | 3.3  | 100.5 | 43.4                       | 36.9   | 15.9  | 92.8  | 0.247        |
| 1125.18                  | 64.7                       | 71.0   | 24.1 | 95.6  | 78.6                       | 70.4   | 57.7  | 165.6 | 0.368        |
| 1131.10                  | 16.8                       | 12.1   | 0.0  | 55.2  | 17.3                       | 10.6   | 0.0   | 67.6  | 0.617        |
| 1137.68                  | 31.2                       | 25.0   | 9.8  | 73.0  | 31.4                       | 28.9   | 14.3  | 61.7  | 0.795        |
| 1153.72                  | 27.0                       | 23.9   | 14.3 | 46.0  | 28.4                       | 30.5   | 8.9   | 48.1  | 0.719        |
| 1163.01                  | 17.8                       | 18.8   | 8.8  | 24.0  | 18.4                       | 19.1   | 13.3  | 26.0  | 0.742        |
| 1169.55                  | 32.6                       | 27.4   | 5.9  | 57.8  | 35.0                       | 37.1   | 4.5   | 54.1  | 0.678        |
| 1181.45                  | 12.2                       | 11.0   | 6.1  | 18.3  | 12.1                       | 12.2   | 4.7   | 20.7  | 0.949        |
| 1193.26                  | 57.3                       | 52.9   | 4.9  | 128.5 | 71.2                       | 78.4   | 32.9  | 102.2 | 0.216        |
| 1212.70                  | 72.5                       | 73.5   | 17.8 | 129.0 | 82.6                       | 73.2   | 48.5  | 143.8 | 0.327        |
| 1226.06                  | 13.7                       | 13.0   | 6.4  | 21.4  | 16.5                       | 16.4   | 9.4   | 22.6  | 0.070        |
| 1234.75                  | 26.6                       | 28.2   | 3.6  | 61.6  | 24.0                       | 21.6   | 13.5  | 37.2  | 0.526        |
| 1241.61                  | 11.2                       | 10.9   | 0.6  | 22.0  | 11.5                       | 12.7   | 0.2   | 26.2  | 0.900        |
| 1250.00                  | 19.3                       | 22.0   | 4.2  | 28.1  | 22.4                       | 23.3   | 10.3  | 32.6  | 0.307        |
| 1257.86                  | 20.6                       | 22.1   | 5.5  | 39.9  | 18.7                       | 19.6   | 1.1   | 31.9  | 0.567        |
| 1264.51                  | 20.0                       | 11.4   | 1.5  | 100.3 | 13.0                       | 9.9    | 2.9   | 30.8  | 0.674        |
| 1269.60                  | 17.0                       | 10.2   | 3.3  | 82.4  | 20.2                       | 15.2   | 6.3   | 43.1  | 0.105        |
| 1278.25                  | 17.6                       | 14.9   | 0.0  | 89.4  | 8.7                        | 9.5    | 0.0   | 21.5  | 0.254        |
| 1286.21                  | 17.5                       | 16.3   | 5.7  | 35.0  | 17.7                       | 17.5   | 10.4  | 25.9  | 0.925        |
| 1301.65                  | 10.7                       | 8.8    | 2.9  | 24.6  | 10.6                       | 12.1   | 2.7   | 19.0  | 0.857        |
| 1343.62                  | 15.7                       | 14.9   | 0.0  | 55.4  | 13.8                       | 12.4   | 7.2   | 22.1  | 0.674        |
| 1350.81                  | 21.9                       | 15.8   | 4.1  | 79.3  | 13.5                       | 14.9   | 5.9   | 27.2  | 0.254        |
| 1363.94                  | 14.4                       | 10.5   | 1.7  | 29.6  | 16.0                       | 18.9   | 5.3   | 28.4  | 0.614        |
| 1370.10                  | 39.5                       | 42.9   | 1.2  | 72.3  | 26.7                       | 27.5   | 7.6   | 51.7  | <b>0.026</b> |
| 1380.63                  | 15.5                       | 13.0   | 0.6  | 36.8  | 21.2                       | 16.1   | 3.8   | 40.5  | 0.200        |
| 1385.60                  | 23.1                       | 22.6   | 2.3  | 45.6  | 24.8                       | 25.1   | 13.3  | 36.7  | 0.673        |
| 1419.58                  | 31.4                       | 32.5   | 2.3  | 55.8  | 21.7                       | 19.7   | 7.2   | 33.5  | <b>0.032</b> |
| 1425.22                  | 11.7                       | 10.3   | 1.0  | 44.7  | 16.0                       | 14.6   | 7.9   | 33.5  | 0.052        |
| 1435.03                  | 16.9                       | 15.0   | 1.7  | 43.4  | 11.7                       | 11.8   | 7.7   | 15.7  | <b>0.048</b> |
| 1450.82                  | 51.8                       | 57.0   | 4.3  | 86.5  | 63.4                       | 68.7   | 34.0  | 93.0  | 0.289        |
| 1466.64                  | 129.9                      | 98.9   | 6.5  | 402.4 | 73.9                       | 60.8   | 40.2  | 170.6 | 0.075        |
| 1482.32                  | 15.7                       | 14.8   | 0.0  | 53.6  | 17.0                       | 16.2   | 6.1   | 33.1  | 0.617        |
| 1488.59                  | 19.7                       | 13.3   | 2.2  | 74.4  | 7.0                        | 6.5    | 3.1   | 10.8  | <b>0.006</b> |
| 1499.94                  | 141.4                      | 151.3  | 13.4 | 256.7 | 181.4                      | 182.6  | 104.8 | 256.2 | 0.124        |
| 1521.57                  | 34.3                       | 32.4   | 2.5  | 86.3  | 31.2                       | 31.3   | 13.4  | 55.2  | 0.635        |
| 1537.77                  | 152.5                      | 155.4  | 5.5  | 382.4 | 116.6                      | 111.3  | 62.8  | 200.9 | 0.154        |
| 1553.87                  | 91.0                       | 82.9   | 3.8  | 188.5 | 98.0                       | 103.3  | 37.7  | 171.6 | 0.649        |
| 1575.86                  | 39.4                       | 41.4   | 0.8  | 60.5  | 36.1                       | 35.3   | 22.6  | 58.6  | 0.533        |
| 1607.09                  | 47.7                       | 43.4   | 3.9  | 91.9  | 45.7                       | 46.0   | 15.8  | 77.1  | 0.813        |

Table S2. *Cont.*

| Peptide Ion<br>( <i>m/z</i> ) | Intensities in the Samples   |        |      |       |                                |        |      |       | <i>p</i> -Value * |
|-------------------------------|------------------------------|--------|------|-------|--------------------------------|--------|------|-------|-------------------|
|                               | Study Group ( <i>n</i> = 18) |        |      |       | Control Group ( <i>n</i> = 13) |        |      |       |                   |
|                               | Average                      | Median | Min. | Max.  | Average                        | Median | Min. | Max.  |                   |
| 1617.69                       | 86.6                         | 85.8   | 2.0  | 239.0 | 60.4                           | 49.0   | 26.9 | 123.8 | 0.222             |
| 1640.30                       | 31.2                         | 25.5   | 2.4  | 161.6 | 25.6                           | 21.9   | 7.8  | 67.8  | 0.764             |
| 1720.22                       | 15.2                         | 11.3   | 2.6  | 40.3  | 12.4                           | 12.3   | 7.1  | 19.0  | 0.920             |
| 1748.12                       | 128.6                        | 141.1  | 8.8  | 240.9 | 133.8                          | 144.2  | 69.6 | 178.6 | 0.793             |
| 1754.88                       | 37.6                         | 42.6   | 3.8  | 67.4  | 47.3                           | 49.9   | 21.5 | 62.7  | 0.105             |
| 1770.06                       | 18.1                         | 12.5   | 0.5  | 55.8  | 13.6                           | 14.1   | 1.6  | 26.6  | 0.826             |
| 1777.62                       | 38.6                         | 33.9   | 1.0  | 86.0  | 29.5                           | 29.6   | 15.5 | 47.3  | 0.119             |
| 1790.40                       | 23.9                         | 28.1   | 0.8  | 52.8  | 24.2                           | 24.6   | 4.6  | 38.6  | 0.950             |
| 1831.02                       | 12.7                         | 13.2   | 0.7  | 21.6  | 11.8                           | 11.4   | 5.4  | 23.8  | 0.670             |
| 1848.29                       | 61.8                         | 58.2   | 3.5  | 109.2 | 57.6                           | 53.8   | 30.8 | 84.1  | 0.607             |
| 1866.56                       | 28.7                         | 23.7   | 3.3  | 71.1  | 24.3                           | 25.0   | 11.4 | 37.1  | 0.376             |
| 1897.55                       | 132.7                        | 139.4  | 12.5 | 223.6 | 144.8                          | 142.3  | 62.2 | 209.1 | 0.496             |
| 1919.57                       | 13.9                         | 14.2   | 0.0  | 34.2  | 10.5                           | 11.4   | 1.5  | 19.6  | 0.209             |
| 1928.59                       | 32.8                         | 30.4   | 1.8  | 69.3  | 36.8                           | 31.2   | 20.4 | 66.9  | 0.572             |
| 1935.57                       | 35.4                         | 29.4   | 3.5  | 68.9  | 34.2                           | 35.5   | 21.6 | 50.8  | 0.562             |
| 1945.86                       | 65.8                         | 65.2   | 3.0  | 173.7 | 69.4                           | 74.3   | 18.7 | 99.3  | 0.816             |
| 1952.26                       | 30.3                         | 35.8   | 0.0  | 77.7  | 21.1                           | 18.2   | 1.2  | 41.7  | 0.589             |
| 1967.87                       | 10.7                         | 7.7    | 0.1  | 39.5  | 9.2                            | 10.8   | 0.6  | 13.1  | 0.920             |
| 1981.97                       | 11.0                         | 5.5    | 0.3  | 57.8  | 9.5                            | 8.7    | 1.5  | 20.1  | 0.347             |
| 1993.69                       | 21.2                         | 16.9   | 1.8  | 53.0  | 12.4                           | 11.2   | 5.3  | 30.9  | 0.057             |
| 2022.64                       | 172.5                        | 164.4  | 15.1 | 306.5 | 190.6                          | 165.4  | 88.6 | 297.9 | 0.418             |
| 2034.71                       | 19.8                         | 19.8   | 0.0  | 52.3  | 13.2                           | 13.3   | 1.0  | 28.7  | 0.160             |
| 2044.64                       | 25.4                         | 21.8   | 1.1  | 65.0  | 22.6                           | 21.8   | 9.8  | 46.0  | 0.535             |
| 2061.79                       | 17.3                         | 15.5   | 2.0  | 41.8  | 13.0                           | 12.4   | 5.2  | 22.9  | 0.154             |
| 2082.90                       | 61.0                         | 67.6   | 5.2  | 118.6 | 69.1                           | 72.2   | 24.8 | 100.4 | 0.435             |
| 2108.63                       | 49.1                         | 48.7   | 2.5  | 119.6 | 49.9                           | 42.6   | 20.6 | 99.5  | 0.947             |
| 2116.69                       | 32.6                         | 34.7   | 0.6  | 89.4  | 30.2                           | 32.1   | 8.5  | 50.9  | 0.746             |
| 2126.66                       | 13.3                         | 14.9   | 0.2  | 30.8  | 17.2                           | 16.8   | 7.2  | 24.7  | 0.170             |
| 2168.63                       | 50.4                         | 60.7   | 5.3  | 85.8  | 70.6                           | 74.5   | 31.4 | 100.9 | <b>0.026</b>      |
| 2190.48                       | 54.3                         | 53.6   | 2.6  | 127.2 | 53.4                           | 51.1   | 24.0 | 98.3  | 0.937             |
| 2210.83                       | 51.7                         | 53.0   | 8.9  | 84.9  | 71.4                           | 66.5   | 41.5 | 115.6 | <b>0.027</b>      |
| 2229.94                       | 67.3                         | 60.5   | 4.6  | 227.0 | 41.8                           | 40.1   | 10.2 | 84.4  | 0.509             |
| 2238.78                       | 20.0                         | 18.3   | 1.0  | 62.2  | 24.3                           | 25.5   | 6.7  | 49.7  | 0.417             |
| 2251.32                       | 13.6                         | 9.9    | 2.0  | 31.5  | 8.8                            | 8.3    | 2.4  | 14.9  | 0.327             |
| 2272.80                       | 31.9                         | 40.5   | 2.3  | 54.7  | 45.7                           | 44.3   | 21.9 | 66.7  | 0.089             |
| 2283.91                       | 29.6                         | 20.4   | 1.5  | 81.8  | 15.8                           | 13.1   | 5.0  | 46.7  | 0.089             |
| 2288.31                       | 20.9                         | 19.6   | 3.9  | 36.3  | 17.0                           | 16.4   | 10.4 | 30.6  | 0.124             |
| 2311.84                       | 43.0                         | 36.9   | 3.8  | 100.4 | 53.0                           | 56.9   | 20.8 | 89.3  | 0.264             |
| 2358.10                       | 82.0                         | 85.7   | 5.7  | 166.2 | 89.9                           | 97.8   | 33.0 | 133.9 | 0.602             |
| 2366.74                       | 30.6                         | 24.1   | 1.9  | 81.8  | 45.6                           | 50.5   | 10.1 | 74.9  | 0.073             |
| 2410.09                       | 13.6                         | 15.7   | 0.2  | 27.5  | 11.5                           | 10.9   | 1.8  | 27.3  | 0.435             |
| 2425.62                       | 19.4                         | 14.3   | 1.3  | 41.2  | 23.6                           | 23.3   | 11.2 | 44.5  | 0.314             |
| 2474.70                       | 14.4                         | 15.4   | 0.6  | 38.2  | 15.1                           | 15.2   | 9.3  | 22.8  | 0.795             |
| 2485.95                       | 68.5                         | 62.9   | 4.0  | 153.0 | 86.8                           | 84.8   | 38.7 | 144.9 | 0.162             |
| 2547.25                       | 46.5                         | 52.1   | 1.1  | 120.5 | 47.1                           | 43.5   | 20.3 | 83.0  | 0.963             |
| 2553.54                       | 70.3                         | 70.3   | 5.6  | 136.4 | 82.2                           | 82.6   | 46.7 | 116.7 | 0.325             |
| 2567.45                       | 23.1                         | 18.7   | 0.9  | 50.2  | 25.5                           | 23.9   | 9.4  | 55.1  | 0.412             |
| 2660.94                       | 57.2                         | 54.3   | 3.3  | 148.1 | 56.1                           | 59.2   | 16.8 | 86.4  | 0.459             |
| 2682.92                       | 25.8                         | 24.6   | 1.3  | 65.3  | 29.3                           | 26.6   | 8.9  | 60.4  | 0.545             |
| 2726.10                       | 13.7                         | 12.9   | 1.0  | 43.0  | 12.3                           | 11.9   | 3.1  | 19.7  | 0.984             |
| 2756.59                       | 54.6                         | 52.3   | 6.4  | 114.5 | 72.5                           | 65.4   | 31.5 | 129.6 | 0.070             |
| 2769.99                       | 43.6                         | 40.6   | 3.9  | 98.5  | 40.6                           | 35.7   | 22.0 | 61.4  | 0.685             |
| 2863.08                       | 125.9                        | 137.3  | 8.3  | 189.4 | 137.1                          | 142.7  | 67.0 | 220.0 | 0.538             |

Table S2. Cont.

| Peptide Ion<br>( <i>m/z</i> ) | Intensities in the Samples   |        |      |       |                                |        |      |       | <i>p</i> -Value * |
|-------------------------------|------------------------------|--------|------|-------|--------------------------------|--------|------|-------|-------------------|
|                               | Study Group ( <i>n</i> = 18) |        |      |       | Control Group ( <i>n</i> = 13) |        |      |       |                   |
|                               | Average                      | Median | Min. | Max.  | Average                        | Median | Min. | Max.  |                   |
| 2883.06                       | 41.9                         | 50.4   | 3.5  | 71.0  | 46.0                           | 49.2   | 16.1 | 70.2  | 0.889             |
| 2902.32                       | 15.4                         | 15.6   | 0.8  | 29.0  | 13.6                           | 12.9   | 3.9  | 21.2  | 0.499             |
| 2913.15                       | 9.6                          | 3.9    | 0.0  | 37.5  | 26.0                           | 25.4   | 4.4  | 56.8  | <b>0.002</b>      |
| 2933.15                       | 100.0                        | 99.2   | 7.2  | 206.8 | 92.1                           | 98.5   | 25.8 | 146.3 | 0.678             |
| 2946.48                       | 19.8                         | 19.5   | 1.5  | 44.4  | 15.8                           | 15.2   | 6.2  | 33.9  | 0.302             |
| 2954.76                       | 14.8                         | 10.6   | 1.7  | 45.7  | 8.7                            | 9.7    | 0.0  | 19.4  | 0.412             |
| 3040.35                       | 18.7                         | 17.5   | 0.2  | 35.1  | 19.0                           | 11.2   | 5.6  | 61.0  | 0.589             |
| 3061.23                       | 28.0                         | 26.2   | 5.1  | 99.4  | 39.6                           | 35.0   | 12.3 | 77.8  | 0.123             |
| 3118.42                       | 13.4                         | 12.7   | 0.3  | 34.0  | 12.8                           | 13.9   | 3.1  | 23.9  | 0.843             |
| 3158.72                       | 59.8                         | 63.0   | 12.6 | 95.7  | 83.4                           | 85.5   | 53.8 | 114.6 | <b>0.011</b>      |
| 3182.03                       | 9.3                          | 9.7    | 1.7  | 19.7  | 11.2                           | 10.8   | 4.3  | 20.5  | 0.313             |
| 3192.53                       | 35.7                         | 36.5   | 2.8  | 82.8  | 35.8                           | 39.1   | 16.4 | 50.1  | 0.674             |
| 3241.34                       | 47.1                         | 51.2   | 4.3  | 70.5  | 51.0                           | 55.1   | 18.3 | 83.5  | 0.734             |
| 3262.60                       | 15.0                         | 14.1   | 1.0  | 30.4  | 12.0                           | 11.2   | 6.6  | 19.4  | 0.169             |
| 3274.46                       | 18.6                         | 18.8   | 0.2  | 51.8  | 17.7                           | 16.8   | 4.6  | 31.9  | 0.866             |
| 3363.39                       | 14.6                         | 15.2   | 0.3  | 32.6  | 14.8                           | 15.0   | 7.9  | 23.7  | 0.960             |
| 3430.44                       | 28.2                         | 31.0   | 3.2  | 60.4  | 44.9                           | 46.1   | 29.0 | 58.6  | <b>0.003</b>      |
| 3521.79                       | 27.2                         | 28.7   | 2.1  | 55.4  | 26.9                           | 30.1   | 9.2  | 46.5  | 0.962             |
| 3633.53                       | 16.8                         | 17.8   | 0.2  | 43.6  | 17.4                           | 17.7   | 8.9  | 25.7  | 0.853             |
| 3681.87                       | 15.6                         | 17.7   | 2.8  | 25.7  | 19.7                           | 22.7   | 10.7 | 26.6  | 0.123             |
| 3772.27                       | 9.8                          | 10.3   | 1.8  | 21.9  | 10.4                           | 11.9   | 4.5  | 15.6  | 0.746             |
| 3814.27                       | 22.3                         | 27.9   | 2.2  | 41.6  | 24.2                           | 24.8   | 9.0  | 40.3  | 0.952             |
| 3868.05                       | 25.7                         | 27.4   | 2.6  | 50.5  | 26.2                           | 25.7   | 13.0 | 43.9  | 0.927             |
| 3955.79                       | 35.3                         | 34.0   | 5.6  | 74.9  | 40.0                           | 44.5   | 16.6 | 60.0  | 0.531             |
| 4092.82                       | 25.7                         | 26.1   | 1.8  | 52.4  | 27.4                           | 28.8   | 5.8  | 52.3  | 0.764             |
| 4111.89                       | 26.8                         | 27.1   | 7.9  | 54.1  | 39.7                           | 37.2   | 28.4 | 52.9  | <b>0.002</b>      |
| 4250.07                       | 12.0                         | 9.7    | 0.9  | 26.1  | 8.5                            | 7.1    | 2.9  | 22.9  | 0.435             |
| 4282.12                       | 37.2                         | 33.5   | 4.0  | 93.5  | 40.2                           | 40.1   | 15.3 | 70.9  | 0.327             |
| 4298.81                       | 11.4                         | 9.5    | 1.8  | 34.0  | 13.1                           | 11.5   | 6.4  | 29.3  | 0.721             |
| 4418.32                       | 66.6                         | 61.8   | 8.3  | 149.5 | 53.5                           | 52.9   | 25.2 | 103.5 | 0.302             |
| 4437.76                       | 40.8                         | 40.3   | 6.1  | 99.2  | 54.7                           | 51.9   | 43.3 | 71.6  | <b>0.028</b>      |
| 4574.22                       | 77.6                         | 68.9   | 30.4 | 132.6 | 85.9                           | 80.4   | 53.8 | 124.6 | 0.431             |
| 4590.58                       | 24.2                         | 23.9   | 8.8  | 39.6  | 32.8                           | 32.7   | 18.0 | 44.5  | <b>0.007</b>      |
| 4713.01                       | 12.5                         | 9.4    | 2.0  | 43.4  | 8.6                            | 7.3    | 4.1  | 16.5  | 0.484             |
| 5002.29                       | 33.6                         | 32.5   | 1.0  | 62.2  | 29.7                           | 23.1   | 9.8  | 52.7  | 0.554             |
| 5159.84                       | 78.2                         | 79.5   | 4.8  | 147.4 | 89.0                           | 84.8   | 46.8 | 142.4 | 0.426             |
| 5904.15                       | 14.9                         | 15.4   | 1.9  | 30.6  | 16.0                           | 16.5   | 4.3  | 30.2  | 0.719             |
| 6432.43                       | 13.4                         | 11.9   | 4.9  | 26.5  | 16.5                           | 13.6   | 4.9  | 32.0  | 0.225             |
| 6630.80                       | 33.8                         | 36.5   | 14.2 | 52.0  | 38.3                           | 40.2   | 16.1 | 52.0  | 0.301             |
| 6646.56                       | 14.7                         | 12.3   | 3.8  | 31.0  | 14.5                           | 10.6   | 2.2  | 43.0  | 0.764             |
| 8603.13                       | 9.6                          | 8.8    | 2.1  | 22.8  | 12.1                           | 12.8   | 5.6  | 19.8  | 0.210             |
| 9134.67                       | 19.4                         | 18.6   | 0.5  | 42.4  | 20.3                           | 20.4   | 5.0  | 32.4  | 0.819             |
| 9150.01                       | 19.7                         | 18.1   | 10.2 | 40.0  | 19.7                           | 19.6   | 9.4  | 32.0  | 0.999             |
| 9424.76                       | 19.3                         | 17.7   | 2.6  | 39.9  | 19.0                           | 19.8   | 8.0  | 29.9  | 0.927             |
| 9440.47                       | 14.5                         | 11.3   | 5.3  | 46.3  | 13.6                           | 13.5   | 2.0  | 25.8  | 0.984             |

\* *p*-values were calculated according to *t*-test or Mann-Whitney *U* test.

**Table S3.** The Mascot search results of the  $m/z$  2911.4712; 1465.6566.

| Protein ID  | Observed ( $m/z$ ) | Mr (expt) | Mr (calc) | ppm  | Mascot Score | Peptide Sequence               |
|-------------|--------------------|-----------|-----------|------|--------------|--------------------------------|
| APOA4_HUMAN | 2911.4712          | 2910.4639 | 2910.4584 | 1.91 | 153          | R.GNTEGLQKSLAELGGHLDQQVEEFRR.R |
| FIBA_HUMAN  | 1465.6566          | 1464.6494 | 1464.6481 | 0.85 | 140          | A.DSGEGDFLAEGGGVR.G            |

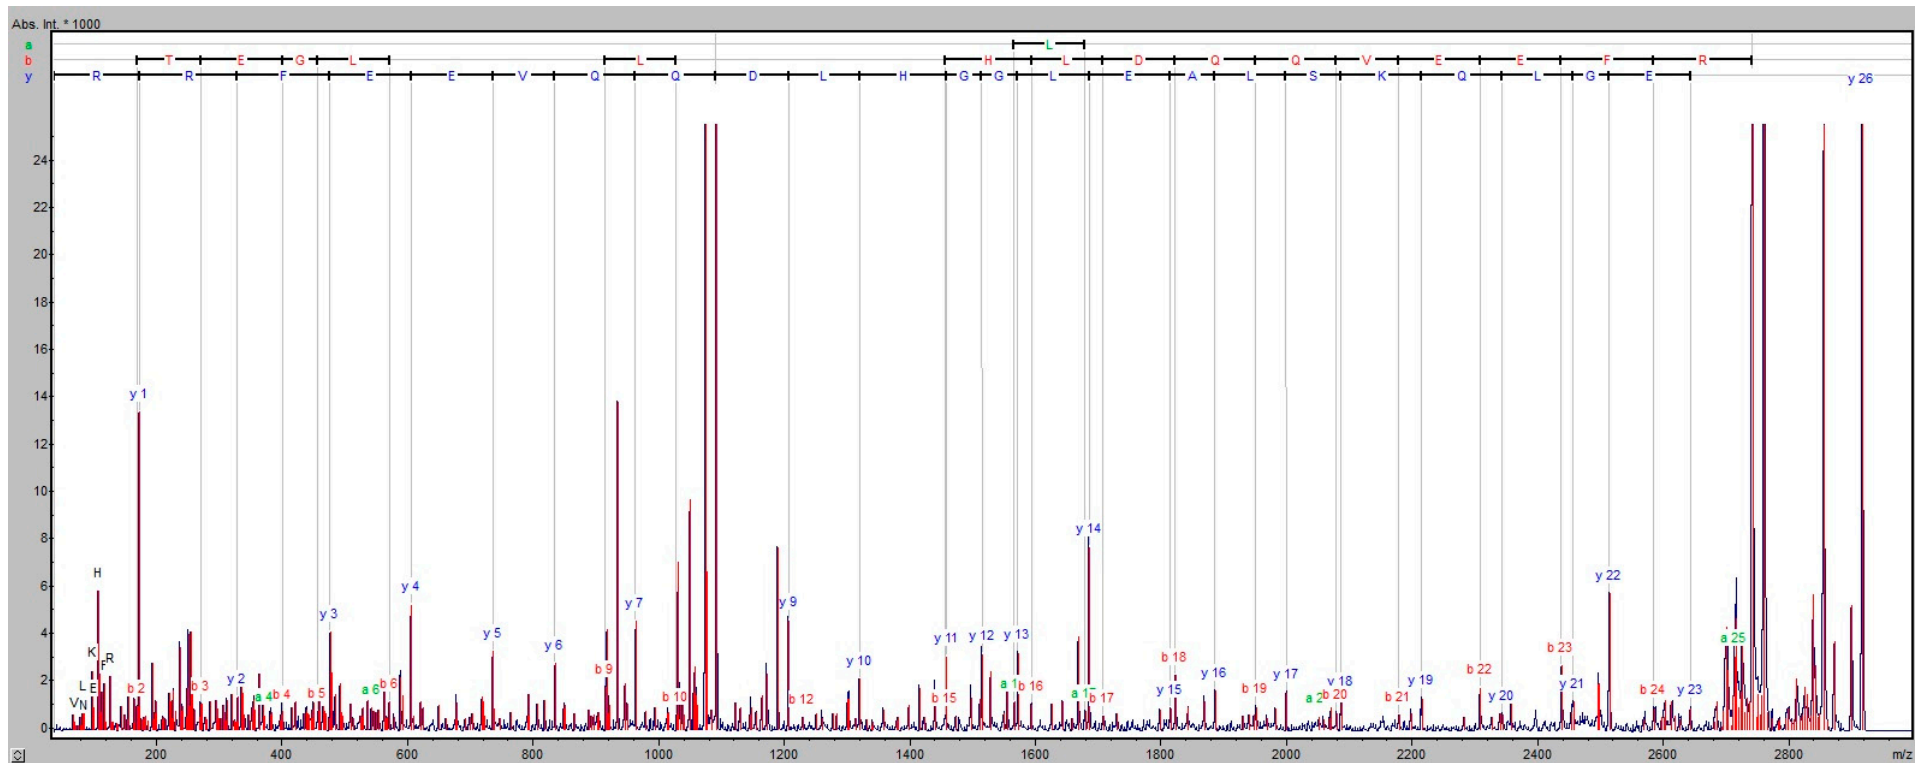

**Figure S1.** The MS/MS spectrum of  $m/z$  2911.4712 with annotation of a-, b- and y-ions. Peptide sequence: R.GNTEGLQKSLAELGGHLDQQVEEFRR.R.

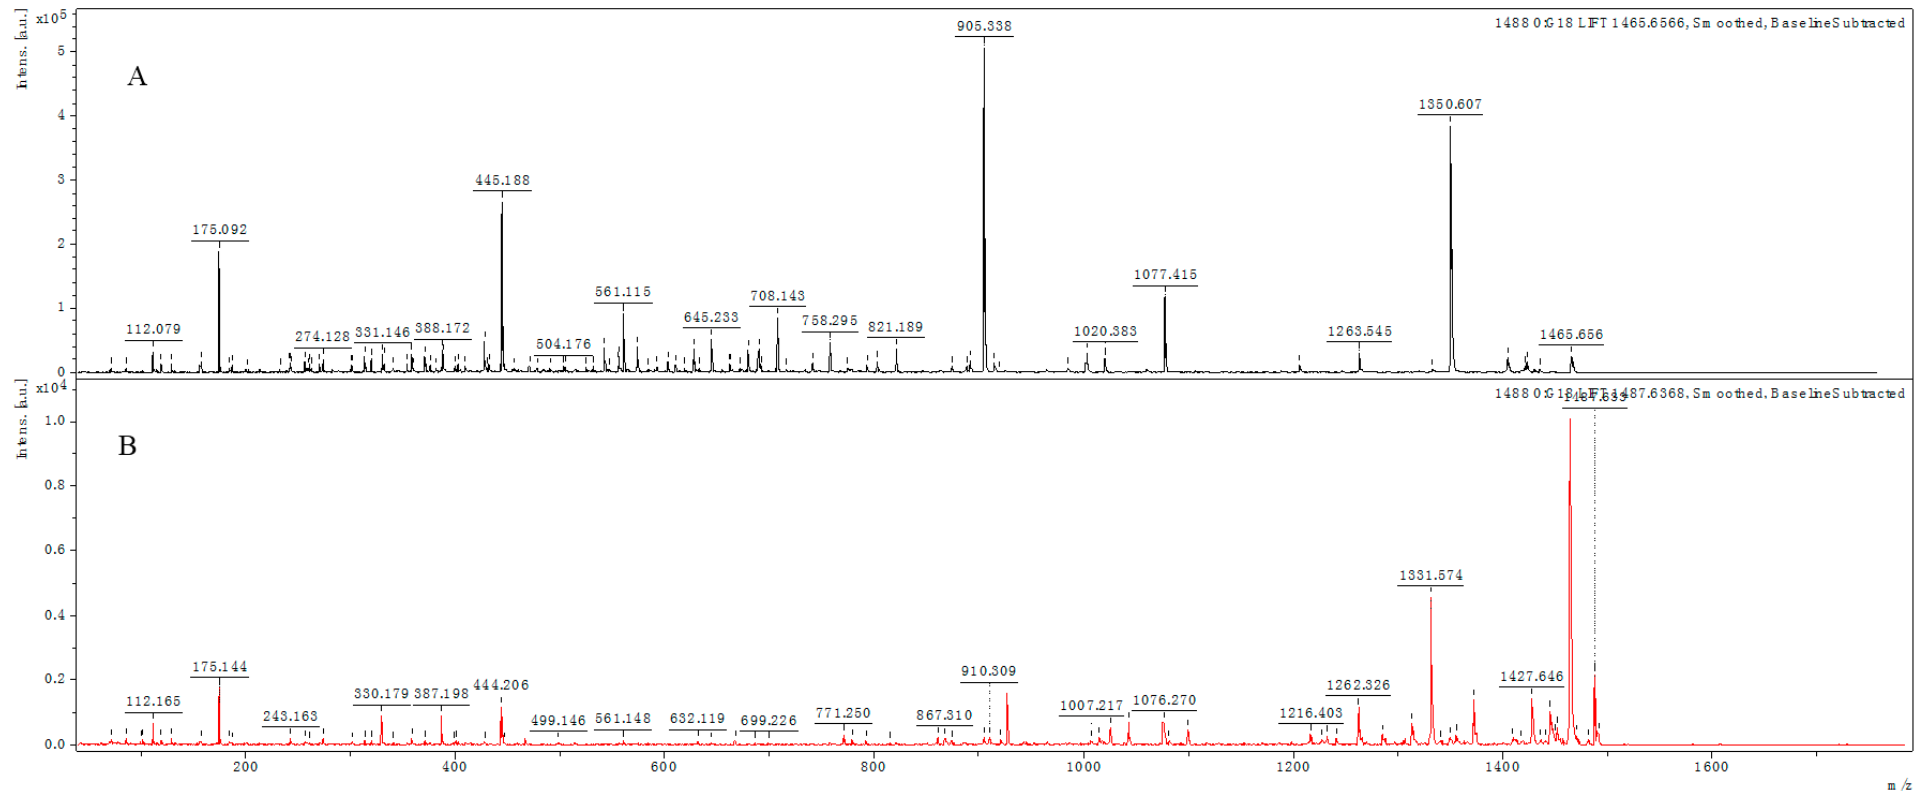

**Figure S2.** The comparison of MS/MS spectra of  $m/z$  signals 1465.6566 (**A**) vs. 1487.6368; (**B**) processed in Flex Analysis 3.4.
